# Supplementary material
Source: Springer Nature journal article supplement (https://www.springermedizin.de/resource/supplementary/12911_2012_570_MOESM2_ESM.pdf/9525906)

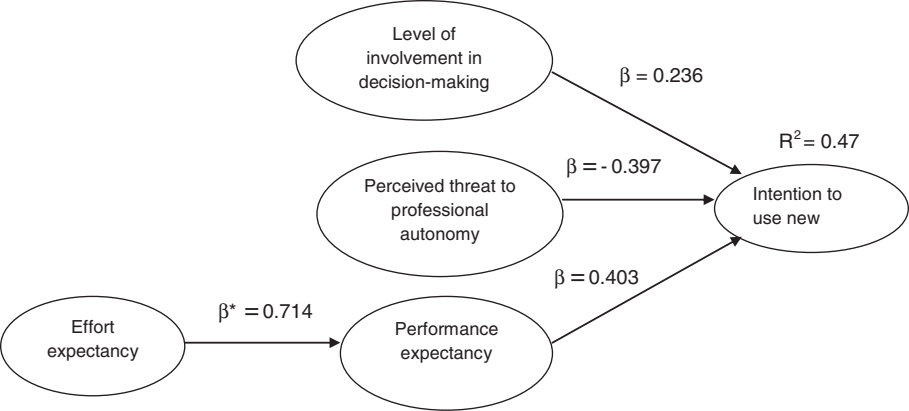

\*standardized coefficient

Supplement: MOESM2 [file 9525906]
